1 **Isolation-by-Drift: Quantifying the Respective Contributions of Genetic**  
2 **Drift and Gene Flow in Shaping Spatial Patterns of Genetic Differentiation**

3

4 Short title: Isolation-by-drift

5

6 Jérôme G. Prunier<sup>1¶\*</sup>, Vincent Dubut<sup>2&</sup>, Lounès Chikhi<sup>3,4&</sup>, Simon Blanchet<sup>1,3¶</sup>

7

8 <sup>1</sup> Station d'Ecologie Expérimentale du CNRS à Moulis, USR 2936, Centre National de la Recherche Scientifique  
9 (CNRS), Moulis, France

10 <sup>2</sup> UMR 7263 – IMBE, Équipe EGE ; Aix Marseille Université, CNRS, IRD, Avignon Université ; Marseille,  
11 France.

12 <sup>3</sup> UMR 5174 EDB (Laboratoire Evolution & Diversité Biologique), Centre National de la Recherche Scientifique  
13 (CNRS), Ecole Nationale de Formation Agronomique (ENFA), Université Paul Sabatier ; Toulouse, France.

14 <sup>4</sup> UMR 5174 (EDB) ; Université de Toulouse, UPS ; Toulouse, France

15

16 **\* Corresponding author**

17 Email: [jerome.prunier@gmail.com](mailto:jerome.prunier@gmail.com) (JGP)

18

19 <sup>¶</sup> These authors contributed equally to this work.

20 <sup>&</sup> These authors also contributed equally to this work.

## 21 **Abstract**

22 Spatial patterns of neutral genetic diversity are often investigated to infer gene flow in wild populations.  
23 However, teasing apart the influence of gene flow from the effect of genetic drift is challenging given that both  
24 forces are acting simultaneously on patterns of genetic differentiation. Here, we tested the relevance of a  
25 distance-based metric -based on estimates of effective population sizes or on environmental proxies for local  
26 carrying capacities- to assess the unique contribution of genetic drift on pairwise measures of genetic  
27 differentiation. Using simulations under various models of population genetics, we demonstrated that one of  
28 three metrics we tested was particularly promising: it correctly and uniquely captured variance in genetic  
29 differentiation that was due to genetic drift when this process was modelled. We further showed that (i) the  
30 unique contribution of genetic drift on genetic differentiation was high (up to 20 %) even when gene flow was  
31 high and for relatively high effective population sizes, and (ii) that this metric was robust to uncertainty in the  
32 estimation of local effective population size (or proxies for carrying capacity). Finally, using an empirical dataset  
33 on a freshwater fish (*Gobio occitaniae*), we demonstrated the usefulness of this metric to quantify the relative  
34 contribution of genetic drift and gene flow in explaining pattern of genetic differentiation in this species. We  
35 conclude that considering Isolation-by-Drift metrics will substantially improve the understanding of evolutionary  
36 drivers of observed spatial patterns of genetic variation.

## 37 **Author Summary**

38 Genetic drift, a major evolutionary process compounded in small populations, is the random alteration of allelic  
39 frequencies over generations. It ultimately leads to a local loss of genetic diversity and to an increase in genetic  
40 differentiation among populations. Genetic drift is however often overlooked in spatial genetic studies, in which  
41 measures of genetic differentiation are thus equated to gene flow only. In this study, we reviewed the distance-  
42 based metrics having been proposed to account for genetic drift. We then used simulations and an empirical  
43 dataset to evaluate the relevance of these metrics. These distances-based metrics are based on estimates of (or  
44 proxies for) population sizes, and is easily implemented in any regression-like analysis. We showed that these  
45 metrics can be efficiently used to quantify the contributions of both gene flow and genetic drift in measures of  
46 genetic differentiation in a large panel of realistic situations, making them a promising tool for geneticists aiming  
47 at better understanding processes underlying genetic differentiation in wild populations.

## 48 **Introduction**

49       The maintenance of dispersal capacities among demes has long been recognized as being of tremendous  
50 importance for the viability of spatially structured populations [1,2], especially in the current context of  
51 increasing habitat fragmentation worldwide [3-5]. Given the technical challenges of directly monitoring  
52 individual movements [6,7], indirect estimates of gene flow (i.e. effective dispersal rates [8]) are now routinely  
53 assessed using molecular tools [9-16]. When investigating the influence of landscape features on gene flow [17-  
54 20], many spatial genetic studies directly rely on pairwise measures of genetic differentiation (i.e. genetic  
55 distances such as *F<sub>st</sub>*; [21,22]) as measures of functional connectivity [23-26]. Direct gradient analyses [27-29]  
56 are then used to investigate the relative contribution of spatial predictors of *isolation-by-distance* (IBD [30]),  
57 *isolation-by-resistance* (IBR [31]) and *isolation-by-environment* (IBE [20,32]) to the variance in pairwise genetic  
58 distances. However, in spatial genetics studies, an important additional source of genetic variation is often  
59 neglected: genetic drift [21,33]. Gene flow and genetic drift indeed interact as opposing forces, the former  
60 decreasing and the latter increasing genetic divergence among populations as their respective influences increase  
61 [34-38]. As a result, pairwise measures of genetic differentiation are directly impacted by the balance between  
62 these two processes [9,34,39] and dispersal rates and functional connectivity may actually be misinterpreted  
63 when genetic drift is overlooked because of biased estimates. Disentangling the respective contributions of these  
64 two evolutionary forces to the variance in genetic differentiation is thus of crude importance, as omitting the  
65 potential influence of genetic drift may strongly affect the interpretation of spatial genetic analyses [40,41].

66       There have been several attempts to relate pairwise measures of genetic differentiation to gene flow while  
67 accounting for genetic drift (e.g. [21,35,42-44]), although most of them do not allow segregating explicitly the  
68 respective effects of gene flow and drift [7,34]. The relative contribution of genetic drift to the variance in  
69 pairwise measures of genetic differentiation may be directly quantified using estimates of census ( $N$ ) or effective  
70 ( $N_e$ ) population sizes [21,33] with the two following basic assumptions: (i)  $N$  is positively correlated to  $N_e$ , and  
71 (ii) the lower  $N_e$  of a population, the higher the effects of genetic drift on allelic frequencies. These estimates of  
72 population sizes can be used to compute distance-based measures of genetic drift, that are then used as any other  
73 predictor (such as environmental, resistance or geographic distances) in regression-like analyses to decompose  
74 sources of variation in pairwise measures of genetic differentiation [28]. To our knowledge, the use of distance-  
75 based measures of genetic drift was first proposed by Relethford [45], computed then as the sum of the inverses  
76 of each (census or effective) population size. More recently, Serrouya et al [40] proposed a similar metric, based  
77 on the harmonic mean of (census or effective) population sizes. The use of such metrics to account for the

78 contribution of genetic drift in spatial patterns of genetic variation was rarely considered in spatial genetics (but  
79 see [46,47]) and their efficiency in capturing the effects of genetic drift has never been tested theoretically,  
80 although it deserves full attention.

81 Directly accounting for genetic drift through the use of  $N$  or  $N_e$  is probably the most straightforward  
82 approach, but implies a major difficulty: estimating these demographic parameters, a task that may turn out to be  
83 tricky [48-50]. Alternatively, we here propose to consider environmental estimates of local carrying capacities  
84 ( $K$ ) as a proxy for population sizes. Carrying capacity reflects the upper asymptote of the logistic growth curve  
85 of a population given the distribution and abundance of resources determined by local environmental conditions  
86 [20,51,52] and can be approximated using specific environmental variables such as habitat patch size or habitat  
87 quality (e.g. [53,54]). Local environmental characteristics are most often used in the framework of IBE to  
88 compute pairwise ecological distances and hence ecological resistance to gene flow [20,32,55-58]. However, we  
89 argue that metrics habitually used in the framework of IBE do not meet the objective of disentangling the  
90 respective contributions of gene flow and genetic drift (see Box 1). Rather, distance-based metrics of genetic  
91 drift could be computed from environmental proxies in place of effective population sizes  $N_e$  using the formulae  
92 proposed by Relethford [45] and Serrouya et al [40] respectively.

93

94 **BOX 1. Why do Euclidian environmental distances fail to capture genetic drift?**

95 Several metrics can be used as ecological distances in the framework of IBE, such as metapopulation  
96 connectivity indices [20,52] or simple univariate/multivariate Euclidean distances [32,47,59-61]. However, they  
97 may not be appropriate to quantify the effect of genetic drift in spatial patterns of genetic variation. For instance,  
98 metapopulation connectivity indices will not allow disentangling the respective contributions of gene flow and  
99 genetic drift as these metrics include both local patch and interpatch data in the same formula. The case of  
100 Euclidean distance metrics is subtler, and can be better understood through a concrete example. Consider four  
101 populations in a river channel (Fig 1). Two of them are located 1km apart in the upstream portion of the channel,  
102 and are respectively characterized by a river width of 10m and 20m. The two other populations are located 1km  
103 apart but in the downstream portion of the channel, and are respectively characterized by a river width of 110m  
104 and 120m. The (Euclidian) difference in river width between upstream populations and between downstream  
105 populations is the same, i.e. 10m. However, as river width may directly drive local carrying capacities [62-64],  
106 we may expect higher genetic differentiation between upstream than between downstream populations simply  
107 because of higher genetic drift upstream. Assuming that degrees of spatial connectivity between upstream and

108 between downstream populations are the same, one may fail to explain variability in pairwise measures of  
 109 genetic differentiation when using a simple Euclidean distance between environmental variables.

110

111 **Fig 1.** The absolute difference between proxies for local carrying capacities  $K$  (here, river width) may fail to  
 112 explain spatial patterns of neutral genetic variation arising from genetic drift.

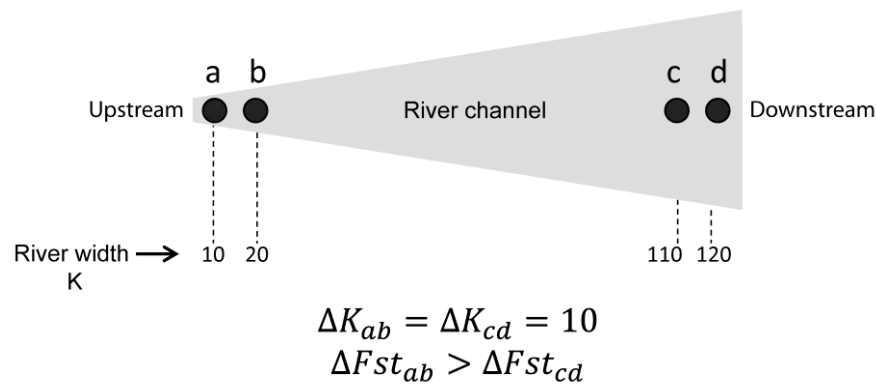

113

114

115 In this study, we compared the relative efficiency of three genetic drift distance metrics based on both  $N_e$   
 116 and environmental proxies for local carrying capacity ( $K$ ) in explaining spatial patterns of genetic variation,  
 117 using regression commonality analyses as a statistical procedure of variance decomposition [28,65]. The first  
 118 metric ( $ds$ ; distance based on the subtraction, i.e. Euclidian distance) is inspired from common measures of IBE.  
 119 The second one ( $di$ ; distance based on the inverse) was proposed by Relethford [45]. The third one is the  
 120 opposite to the harmonic mean (preferred over the arithmetic mean [66]) of carrying capacities ( $dhm$ ; distance  
 121 based on the harmonic mean). Because the metric based on the harmonic mean shows negative relationships with  
 122  $Fst$  [40,46] and thus does not behave as a classical distance-based metric (an increase in the dissimilarity  
 123 between populations is supposed to lead to an increase in genetic differentiation), we rather considered its  
 124 opposite.

125 
$$ds = |K_1 - K_2| \quad (1)$$

126 
$$di = \frac{1}{K_1} + \frac{1}{K_2} = \frac{K_1 + K_2}{K_1 K_2} \quad (2)$$

127 
$$dhm = -\frac{2}{\frac{1}{K_1} + \frac{1}{K_2}} = -\frac{2K_1 K_2}{K_1 + K_2} \quad (3)$$

128 We first investigated the ability and efficiency of each metric to account for genetic drift when they are  
 129 directly computed from  $N_e$ , using simulations in simple two-deme situations and in more complex genetic  
 130 models of population structure. Secondly, we used similar simulations to test whether these metrics are still

131 efficient when based on environmental proxies of carrying capacities, assuming that  $K$  is an imperfect proxy of  
132  $N_e$ . Thirdly, we assessed the efficiency of each metric in an empirical case study involving a fish species (*Gobio*  
133 *occitaniae*) living in a river landscape and using environmental estimates of population sizes. We finally  
134 discussed how and why these simple metrics measuring *isolation-by-drift* (IBDr) should be recurrently used in  
135 spatial genetics studies, notably in the framework of regression commonality analyses. We notably expected the  
136  $ds$  metric inspired from the IBE framework to perform poorly (Box 1), contrary to the  $di$  and  $d_{hm}$  metrics that  
137 are expected to efficiently account for the effect of genetic drift in spatial patterns of genetic variation.

## 138 Results

### 139 Simulated datasets

140 **A simple two-deme model.** As expected, when the migration rate  $m$  between two demes of effective  
141 population sizes  $Ne_1$  and  $Ne_2$  was low ( $m = 0.005$ ), mean  $Fst$  values were highest when both  $Ne_1$  and  $Ne_2$  were  
142 low, decreased when the  $Ne_e$  of one of the two demes increased, and were lowest when both  $Ne_1$  and  $Ne_2$  were  
143 high (Fig 2a). As expected, the  $ds$  metric poorly mirrored patterns of  $Fst$  (Fig 2b;  $r = 0.125$ ). Contrastingly, the  
144  $di$  and  $dhm$  metrics followed patterns very similar to that observed for  $Fst$  (Fig 2c, d), although  $di$  tends to better  
145 fit the general  $Fst$  pattern than  $dhm$  ( $r = 0.962$  and  $r = 0.939$  for  $di$  and  $dhm$  respectively), especially when at  
146 least one of the demes had low to intermediate  $Ne$  (Fig 2d).

147

148 **Fig 2.** Behaviour of  $Fst$  (a) and each genetic drift metric (b:  $ds$ ; c:  $di$ ; d:  $dhm$ ) in a simple two-deme system as a  
149 function of effective population sizes  $Ne_1$  and  $Ne_2$ , expressed as haploid numbers of genes, both ranging from 30  
150 to 300.  $Fst$  values and genetic drift metrics were all standardized. Projections of the 3D perspective surfaces are  
151 shown at the base of each plot.

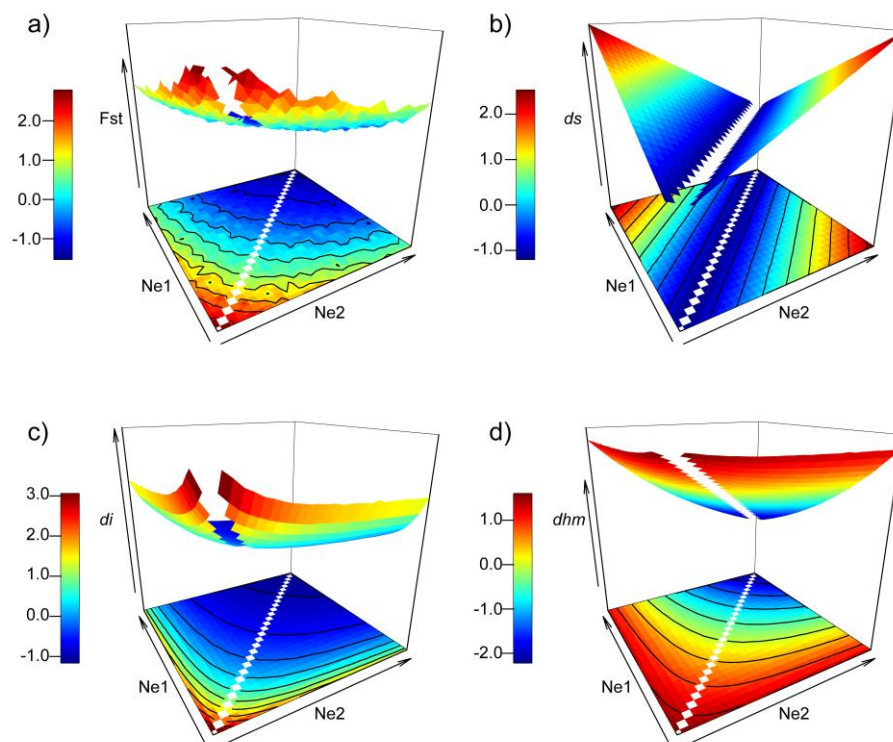

152

153

154

155 When migration rates  $m$  between the two demes were picked from an uniform distribution ranging from  
156 0.0001 to 0.3,  $ds$  systematically failed to explain a substantial proportion of variance in pairwise genetic  
157 distances (Fig 3a). On the contrary,  $di$  (Fig 3b) and  $d_{hm}$  (Fig 3c) respectively explained up to 50% and 45% of  
158 variance in pairwise genetic distances at low migration rates ( $m < 0.005$ ). This relative contribution of these two  
159 metrics decreased exponentially as  $m$  increased; for instance, the contribution of these metrics fell below 5% for  
160  $0.1 < m < 0.15$  (Fig 3b-c). Noteworthy, the dispersion around the model fit was slightly larger for  $di$  than for  
161  $d_{hm}$  (Fig 3b-c).

162

163 **Fig 3.** Contribution of metrics  $ds$  (a),  $di$  (b) and  $d_{hm}$  (c) to the variance in genetic differentiation as a function of  
164 the migration rate  $m$  in a simple two-deme system.

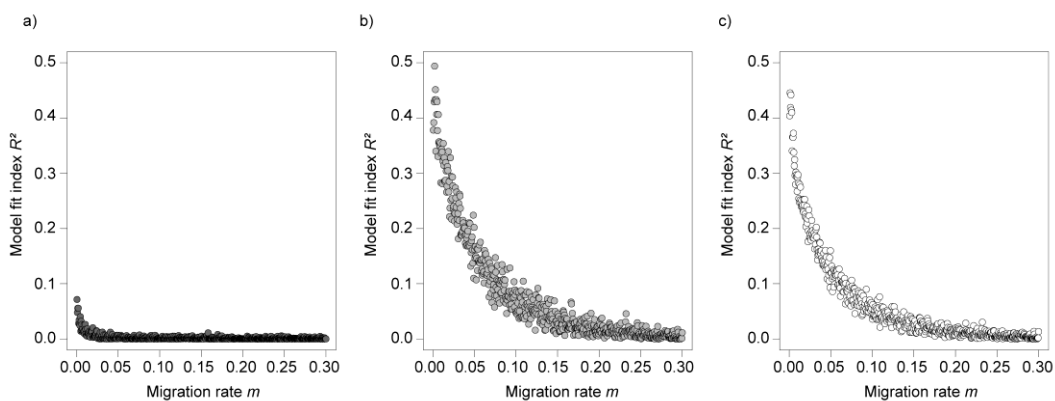

165

166

167 **Realistic genetic models.** To evaluate the efficiency of each metric in more realistic situations, gene flows  
168 were simulated in a one-dimensional linear network or a two-dimensional lattice network. Each network was  
169 composed of 16 demes of varying effective population sizes  $N_{e_i}$  and exchanging migrants at a rate  $m$  following  
170 either a stepping-stone or a spatially limited (IBD) migration model (S2 Fig). For all four genetic models (and  
171 whatever the model parameters), the unique contribution of  $ds$  was close to zero (Fig 4a-d), that is, the amount of  
172 variance uniquely explained by this metric irrespective of the possible collinear effects of the other predictor  
173 coding for inter-deme matrix resistance was negligible. Overall, both  $di$  and  $d_{hm}$  explained a non-negligible part  
174 of the total variance in pairwise  $F_{st}$  (i.e. from 5% to more than 50%) as soon as  $m$  was lower than 0.15 (Fig 4e-l).  
175 Under these conditions ( $m < 0.15$ ), the relative unique contributions of  $di$  and  $d_{hm}$  differed among genetic  
176 models: they were the lowest for a linear network with stepping-stone migration and were the highest in a lattice  
177 network with spatially limited dispersal. In this later case,  $di$  and  $d_{hm}$  explained (for  $m < 0.05$ ) much more  
178 variance than the traditionally used  $mr$  (Fig 4h, l). For other genetic models, the unique contributions of  $di$  and



179 *dhm* were as high as the unique contribution of *mr* as far as *m* remained low. *di* and *dhm* behaved very similarly  
180 with no noticeable differences, although dispersion around the mean was still higher for *di* than for *dhm* for all  
181 genetic models.

182

183 **Fig 4.** Unique contribution of metrics *mr* and *ds* (a-d), or *mr* and *di* (e-h) or *mr* and *dhm* (i-l) as a function of the  
184 migration rate *m* for  $\alpha = 0$ . Results are for a linear network with stepping-stone migration (a, e, i), a linear  
185 network with spatially limited dispersal (b, f, j), a lattice network with stepping-stone migration (c, g, k) and a  
186 lattice network with spatially limited dispersal (d, h, l). Circles represent the average unique contribution of each  
187 variable and coloured areas represent the dispersion of unique contributions around the mean, as defined by  
188 standard deviations (in grey for *mr* and in green for genetic drift distance metrics). Vertical dashed lines indicate  
189 the migration rate *m* above which the unique contribution of genetic drift distance metrics become negligible.

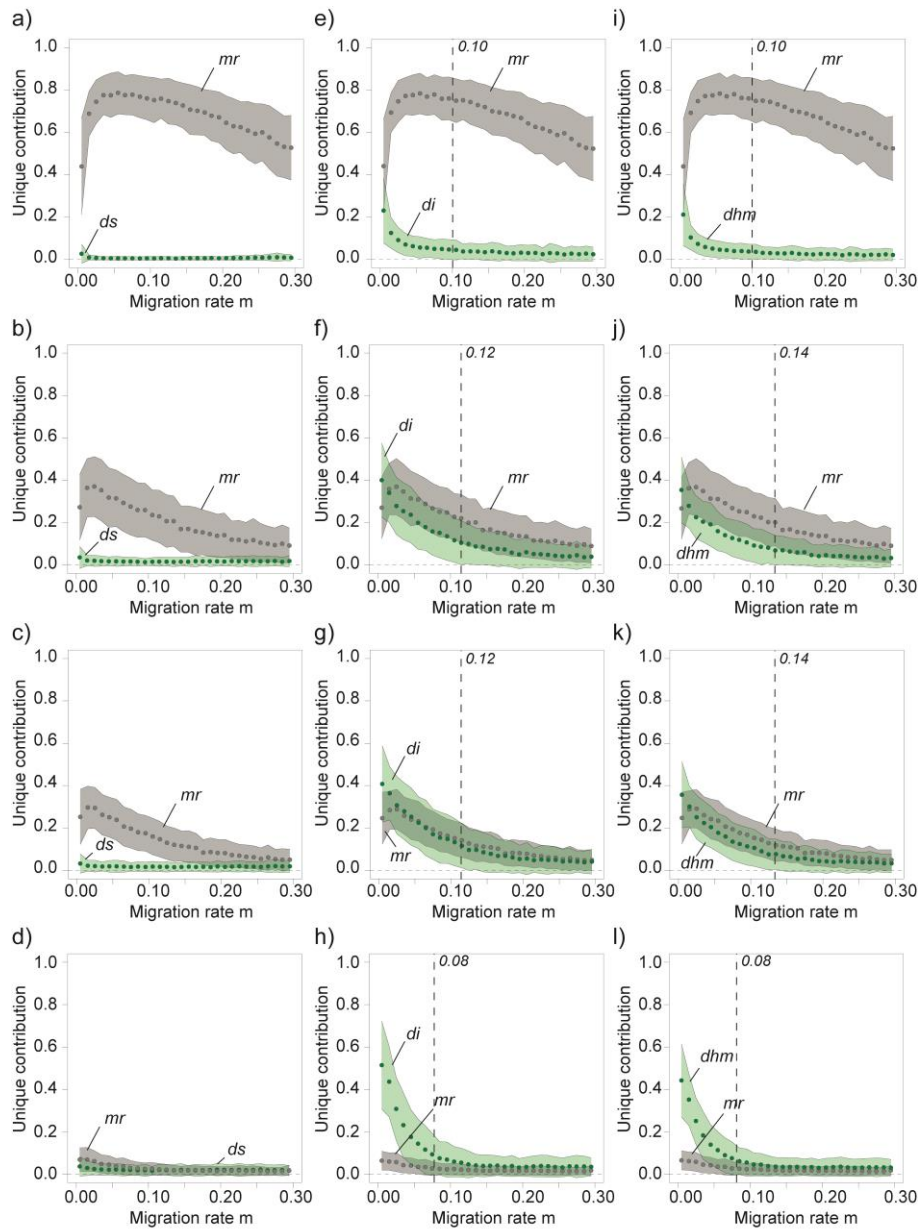

190

191

192 When uncertainty was included in the estimation of demes' effective population size so as to mimic an  
 193 environmental proxy for  $K$  (using  $\alpha \in [-0.9, 0.9]$ ), *mr* and *ds* showed similar patterns to those in absence of  
 194 uncertainty (Fig 4); *ds* systematically failed to explain variance in genetic differentiation. *di* and *dhm* behaved  
 195 similarly to situations where true estimates of  $N_e$  were used, although unique contributions were systematically  
 196 lower (but still substantial for low  $m$  values) in average (Fig 5). Furthermore, dispersion around the mean was  
 197 noticeably larger for *di* than for *dhm*, except for a linear network with stepping-stone migration (Fig 5).

198

199 **Fig 5.** Unique contribution of metrics  $mr$  and  $ds$  (a-d), or  $mr$  and  $di$  (e-h) or  $mr$  and  $dhm$  (i-l) as a function of the  
 200 migration rate  $m$  for an uncertainty parameter  $\alpha$  picked from a uniform distribution ranging from -0.9 to 0.9. See  
 201 legend in Fig 4 for other details.

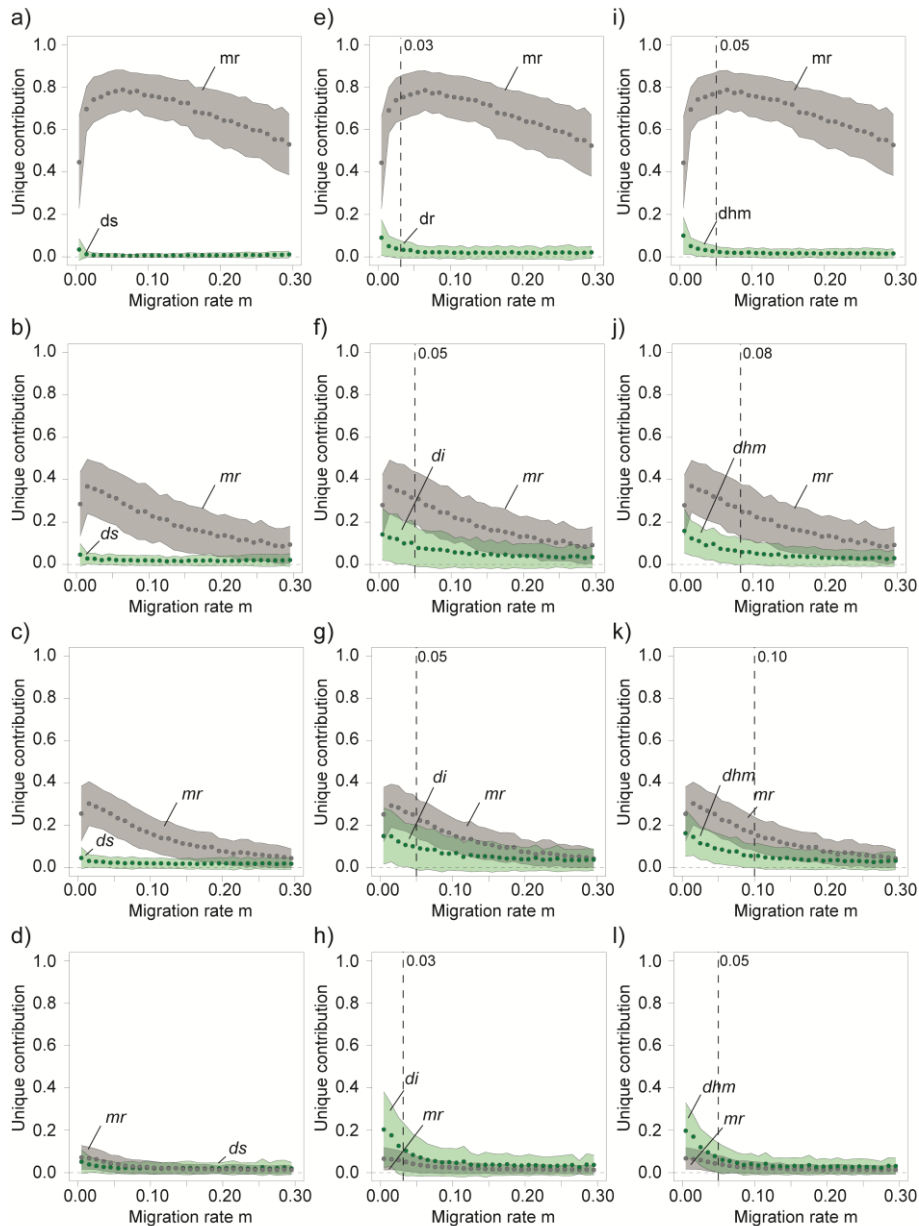

202

## 203 Empirical dataset

204 Concerning the empirical dataset involving the freshwater fish *Gobio occitaniae* in a river network (Fig 6a),  
 205 neither null alleles nor linkage disequilibrium were detected, and all populations were at Hardy-Weinberg  
 206 equilibrium after sequential Bonferroni corrections. Highest mean pairwise  $F_{st}$  values involved population 1 (Fig  
 207 6b), which was situated upstream of the main channel. This population was characterized by the smallest river  
 208 width but was not associated with lowest estimates of home-range size (estimated as the product of length and

209 width of the river network (including tributaries) delimited by any downstream or upstream weir), suggesting  
210 that river width may be a better proxy of  $K$  (and hence genetic drift) than the home range size.

211

212 **Fig 6. Main characteristics of the empirical dataset.** (a) Geographical position of the river Célé (in black) and  
213 its tributaries (in grey). Grey dots represent the 19 sampling sites (numerated along the upstream-downstream  
214 gradient) while small black lines indicate the position of obstacles (weirs) considered in the study (that is,  
215 obstacles located on the mainstream channel and obstacles from tributaries used to compute home-range sizes).  
216 (b) Downstream-upstream profiles of mean  $F_{st}$  values, river width and home-range sizes.

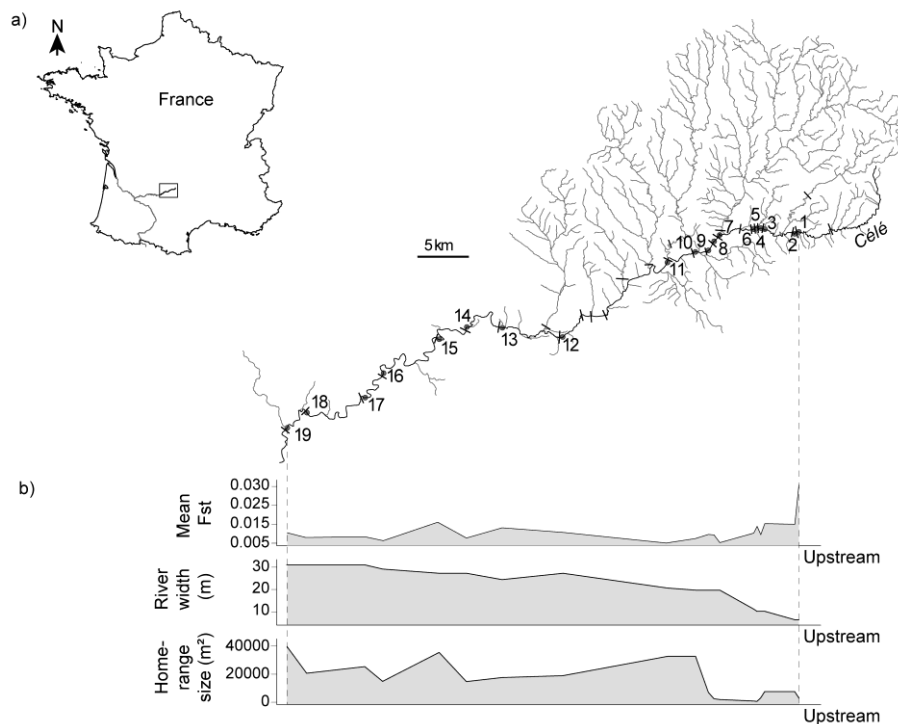

217

218

219 The pattern of IBD was characterized by a slightly positive relationship between  $F_{st}$  and  $mr$  (here coded as  
220 the between-deme riparian distance; Fig 7a). Piecewise regression explained a higher proportion of the variance  
221 in  $F_{st}$  (6.7%) than linear regression (3.2%), but the threshold value, located at about 75 km (Fig. 7a), probably  
222 stemmed from a border effect and had no true biological meaning. Overall, the IBD pattern was characterized by  
223 a wide degree of scatter for all distance classes, suggesting a lack of migration-drift equilibrium with genetic  
224 drift being more influential than gene flow (case III in [34]).

225

226 **Fig 7.** Scatterplot of pairwise  $F_{st}$  against (a) pairwise riparian distances ( $mr$ ), (b) pairwise  $di$  values and (c)  
227 pairwise  $d_{hm}$  values in the empirical dataset. The  $di$  and  $d_{hm}$  metrics were computed from river width. All  
228 explanatory variables ( $mr$ ,  $di$  and  $d_{hm}$ ) were rescaled from 0 to 1 to facilitate comparison of panels.

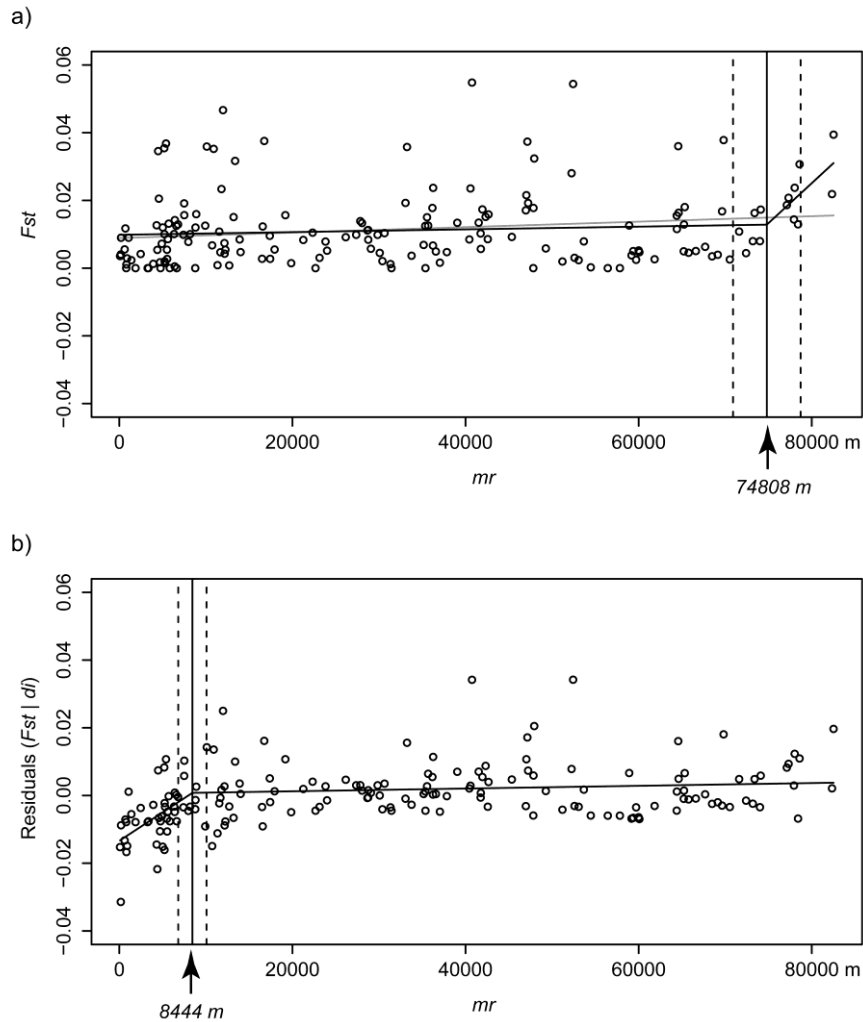

229

230 Whatever the proxy used for  $K$ , the unique contribution of  $mr$  was rather weak, ranging from 1.8 to 7.8%  
 231 (Table 1). This variability in unique contributions of  $mr$  stemmed from collinearity with distance-based metrics  
 232 of genetic drift, as revealed by common contributions  $C$  [28,65]: indeed, the highest unique contribution of  $mr$   
 233 ( $U = 7.8\%$ ) was also associated with the highest (negative) common contribution ( $C = -4.8\%$ ). When  $K$  values  
 234 were estimated from home-range sizes, the model including  $ds$  only explained 3.2% of variance in genetic  
 235 differentiation (Table 1), with a negligible unique contribution of  $ds$  (0.3%). The model including  $di$  did not  
 236 perform better (unique contribution of 1.1%) whereas the model including  $dhm$  explained up to 12.7% of  
 237 variance in genetic differentiation. This substantial increase in model fit stemmed from  $dhm$ 's unique  
 238 contribution ( $U = 9.8\%$ ) while the unique contribution of  $mr$  was comparable to previous models. When  $K$  values  
 239 were estimated from river width, the unique contribution of  $di$  and  $dhm$  strongly increased to reach 41.3% and  
 240 36.7% respectively (Table 1). These results confirm that river width was a better proxy for  $K$  than home-range  
 241 size in this dataset.

242

243 **Table 1. Results of both MRDM and commonality analyses performed on empirical data.**

| $K$         | Model      | $R^2$ | Pred  | $\beta$ | p     | U     | C      | T     |
|-------------|------------|-------|-------|---------|-------|-------|--------|-------|
| Home-Range  | $mr + ds$  | 0.032 | $mr$  | 0.147   | 0.105 | 0.018 | 0.011  | 0.029 |
|             |            |       | $ds$  | 0.059   | 0.488 | 0.003 | 0.011  | 0.014 |
|             | $mr + di$  | 0.040 | $mr$  | 0.185   | 0.038 | 0.034 | -0.004 | 0.029 |
|             |            |       | $di$  | 0.104   | 0.173 | 0.011 | -0.004 | 0.006 |
|             | $mr + dhm$ | 0.127 | $mr$  | 0.192   | 0.026 | 0.037 | -0.008 | 0.029 |
|             |            |       | $dhm$ | 0.313   | 0.001 | 0.098 | -0.008 | 0.090 |
| River width | $mr + di$  | 0.442 | $mr$  | 0.283   | 0.001 | 0.078 | -0.048 | 0.029 |
|             |            |       | $di$  | 0.652   | 0.001 | 0.413 | -0.048 | 0.365 |
|             | $mr + dhm$ | 0.396 | $mr$  | 0.219   | 0.003 | 0.048 | -0.018 | 0.029 |
|             |            |       | $dhm$ | 0.607   | 0.001 | 0.367 | -0.018 | 0.348 |

244 For each type of environmental proxy for carrying capacities ( $K$ ) and each model (Model), the table provides the  
 245 model fit index ( $R^2$ ) and, for each predictor (Pred), the beta weight ( $\beta$ ), the p-value (p) and finally unique (U),  
 246 common (C) and total (T) contributions to the variance in the dependent variable.

247

248

249        When exploring the relationship between residuals of the linear regression between  $F_{st}$  and the  $d_i$  metric  
250 (based on measures of river width) and  $mr$ , piecewise regression explained a substantially higher proportion of  
251 the variance in  $F_{st}$  (23.8%) than linear regression (12.5%). The scatterplot showed an increase in residual values  
252 up to 8.5km and a clear-cut plateau beyond this threshold (Fig 7b). This pattern clearly suggests a lack of  
253 migration-drift equilibrium with gene flow being more influential than genetic drift up to 8.5km (case IV in  
254 [34]). This result indicates that accounting for the confounding contribution of genetic drift to pairwise measures  
255 of genetic differentiation may provide more precise information regarding the spatial extent of gene flow.

256

257

## 258 **Discussion**

259 Our study demonstrates that considering IBDr metrics, that is, distance-based metrics based on estimates of  
260 effective population sizes or on environmental proxies for local carrying capacities, is a highly relevant approach  
261 to disentangle and thoroughly quantify the respective contribution of two major evolutionary processes, gene  
262 flow and genetic drift, to the variance in pairwise measures of genetic differentiation.

263

### 264 **Comparison of IBDr metrics**

265 The distance-based metrics of genetic drift ( $ds$ ,  $di$  and  $dhm$ ) tested here did not perform equally. As  
266 expected,  $ds$  -which is a simple subtraction between  $Ne$  or proxies of  $Ne$  - was a poor estimator of genetic drift.  
267 This observation has important implications for geneticists interested in testing hypothesis regarding isolation-  
268 by-environment. Many local variables may adequately reflect the influence of environment on gene flow  
269 processes such as emigration and immigration [20]: this is the case of variables embodying information about  
270 habitat quality such as resource availability (mating partners, shelters, food), predatory risk or intraspecific  
271 competition [67-69]. For instance, some patches act as sources while others may attract dispersal individuals (i.e.  
272 sink patches), depending on the perception of local patch quality by individuals [70-72]. In this situation, a  
273 simple pairwise Euclidean distance between habitat quality variables may properly mirror the perceptual  
274 distinction driving individuals' dispersal or settlement decisions. However, the case of local variables embodying  
275 information about patch size is more intricate [3]. Of course, effective dispersal events are often density-  
276 dependent ([69]) and gene flow may thus be altered by spatial heterogeneity in patch sizes. But patch sizes may  
277 ultimately reflect local carrying capacities, and thus the possible effects of genetic drift rather than gene flow on  
278 genetic differentiation. In this situation, the use of a simple pairwise Euclidean distance between variables is  
279 irrelevant (see Box 1). Considering local environmental variables for isolation-by-environment studies thus  
280 requires a thorough understanding of their possible influence on effective population sizes and, when required,  
281 the choice of a specific metric such as  $di$  or  $dhm$  to quantify the relative influence of genetic drift. It is  
282 noteworthy that a single variable can be used to estimate both IBE and IBDr through the use of complementary  
283 metrics.

284 When compared to  $ds$ , the  $di$  and  $dhm$  metrics demonstrated a much higher efficiency in quantifying genetic  
285 drift. They both exhibited patterns very similar to  $Fst$  in a simple two-deme situation, properly rendering the  
286 influence of genetic drift on deme differentiation as effective population sizes decreased (Fig 2c-d), and  
287 explaining up to 50% of variance in measures of genetic differentiation for low migration rates (Fig 3b-c). These



288 contributions to genetic variance followed an expected negative exponential as the migration rate increased,  
289 reflecting migration-drift equilibrium [7]. The same conclusions can be drawn from genetic data simulated under  
290 a series of more realistic situations (Fig 4). However, amounts of unique contributions at low migration rates  
291 strikingly depended on population structures and migration models, which reflected variation in the dynamics of  
292 migration-drift equilibriums. Overall, the use of drift metrics allowed explaining substantial amounts of variance  
293 in measures of genetic differentiation (up to 50%) at low migration rates.

294 These metrics were still highly efficient in the fish empirical dataset (Table 1) despite an evident lack of  
295 migration-drift equilibrium (Fig 7a), making them particularly promising even for empirical case studies for  
296 which a deviation from a migration-drift equilibrium is detected [34]. For *G. occitaniae*, the use of  $d_i$  and  $d_{hm}$   
297 indeed allowed explaining substantial amounts of variance in genetic differentiation (Table 1) when river width  
298 was used as a proxy for local carrying capacities: only 2.9% of variance in measures of genetic differentiation  
299 would have been accounted for if  $m_r$  had been considered as the only predictor (data not shown), whereas up to  
300 44.2% is explained when either with  $d_i$  or  $d_{hm}$  are used as additional explanatory variables (Table 1). Finally,  
301 plotting the residuals of the linear regression  $F_{st} \sim d_{hm}$  (or  $F_{st} \sim d_i$ ) against Euclidean distances may help  
302 identify the spatial scale at which the amount of gene flow is counterbalanced by genetic drift, thus providing  
303 further insight into the extent of effective dispersal rate (Fig. 7b). This empirical case study nicely exemplifies  
304 the added value for geneticists of integrating distance-based metrics accounting for isolation-by-drift.

305

## 306 **Direct versus environmental estimates of $N_e$**

307 Interestingly, when a small level of uncertainty in the relationship between effective population sizes and  
308 estimates of local carrying capacities was considered, our simulations showed that both  $d_i$  or  $d_{hm}$  were still  
309 efficient at detecting genetic drift. However,  $d_{hm}$  slightly outperformed  $d_i$  at intermediate migration rates (i.e.,  
310 for  $m$  ranging from 0.05 to 0.1) as the degree of uncertainty increased (S3 Appendix) since  $d_i$ 's unique  
311 contribution to the variance in genetic differentiation showed higher dispersion around the mean than  $d_{hm}$  (Fig  
312 5). This trend was confirmed by the empirical dataset; when local carrying capacities were estimated from home-  
313 range sizes,  $d_i$  failed to detect any genetic drift contribution to genetic differentiation, whereas  $d_{hm}$  -though less  
314 efficient than with river width as a proxy- still explained ~ 10% of variance (Table 1). This difference stems  
315 from the inner characteristics of each metric (Fig 2c-d): While  $d_i$  values are highest for lowest effective  
316 population sizes and show a rapid decrease as soon as effective population sizes increase, the decrease in  $d_{hm}$   
317 values is much softer, thus still allowing the detection of genetic drift effects on genetic differentiation despite

318 higher uncertainty in environmental estimates of local carrying capacities, and eventually effective population  
319 sizes. Although the *d<sub>hm</sub>* metric appeared less efficient at perfectly reflecting the effect of drift in simple  
320 simulated datasets, it may actually be more robust when using environmental proxies for local carrying  
321 capacities and should therefore be preferred (or compared) to *d<sub>i</sub>*. It is noteworthy that the two metrics can easily  
322 be used in competing models and, provided collinearity patterns are inspected [28], the best at fitting the dataset  
323 be selected according to model fit criteria such as the  $R^2$  or the Akaike Information Criteria.

324

### 325 **Biologically relevant metrics**

326 Simulations indicated that the influence of genetic drift was still perceptible for migration rates up to [0.1 -  
327 0.15], irrespective of the genetic model being considered (Figs 3-4-5). Interestingly, this range of values is  
328 higher than migration rates likely to be encountered in natural systems. Indeed, summary statistics from 49  
329 recent empirical studies that used BAYESASS [12] to estimate interpatch migration rates (collected from a  
330 literature survey by [73]; see S2 Text and S2 Table for details) indicated that the median value of average  
331 migration rates was 0.023, with more than 95% of studies showing average estimates lower than 0.1 (S4 Fig).  
332 For instance, the average estimate of migration rates in *G. occitaniae* in our empirical dataset was 0.02  
333 (unpublished data). These observations suggest that genetic drift is likely to be an important driver of spatial  
334 genetic variation in many empirical datasets. We thus argue that considering IBD<sub>r</sub> in future spatial genetic  
335 studies through the use of distance-based metrics such as *d<sub>i</sub>* or *d<sub>hm</sub>* may thoroughly improve our understanding  
336 of observed spatial patterns of genetic variation, at least in situations where genetic drift is the actual main driver  
337 of genetic differentiation.

338

### 339 **Limitations of IBD<sub>r</sub> metrics**

340 Considering the difficulties in accurately estimating  $N_e$  from genetic data [50,74], the use of alternative  
341 estimates of population size such as observed local densities (e.g. [75,76]) or habitat patch size (e.g. [53,54]) to  
342 compute IBD<sub>r</sub> metrics is particularly appealing, but has yet to be considered with caution. The validity of such  
343 metrics indeed proceed from the assumption that effective population sizes have remained constant over time  
344 [45]. This assumption theoretically limits the practical use of distance-based metrics of genetic drift to systems in  
345 which populations are only subject to continuous drift, that is, to the evolutionary process of random fluctuations  
346 in allelic frequencies naturally occurring in all populations, whatever their size (although compounded in small  
347 ones [21,36,37]). For populations having suffered from bottleneck events [37,77] or from founder effects [78],

348 observed densities or local environmental variables may constitute inaccurate proxies for effective population  
349 sizes, thus making genetic drift metrics poor predictors of spatial patterns of genetic differentiation. In these  
350 situations, estimating effective population sizes from molecular data -although a delicate exercise- probably  
351 remains the best option (see [48] for a review synthesizing methods used to estimate  $N_e$ ). More generally,  
352 integrating the demographic processes affecting effective population size over time will be an important  
353 challenge to overcome so as to make spatial genetics an integrative discipline accounting for the complexity of  
354 spatially and temporally dynamic populations [79].

## 355 **Conclusion**

356 Considering the ineluctable interplay between evolutionary forces such as gene flow and genetic drift, the  
357 combined use of distance-based metrics of genetic drift and classical landscape predictors such as matrix  
358 resistance metrics or ecological distances in regression commonality analyses [28] may substantially improve  
359 our understanding of how each process respectively contributes to observed spatial patterns of genetic variation.  
360 This approach is all the more relevant as it may provide accurate information about the contribution of each  
361 process even when a lack of migration-drift regional equilibrium has been identified, which constitutes a  
362 substantial advantage over many other methods.

363 More generally, habitats modifications by humans have two components [3,80]; one acting on decreasing  
364 connectivity (fragmentation) and another acting on habitat and resource availability (habitat loss and  
365 degradation). By reducing the size of available habitats and by decreasing connectivity among habitats, humans  
366 are rapidly making the ground more and more fertile for genetic drift to becoming an increasingly influential  
367 evolutionary process. We therefore believe that the time is ripe to systematically quantify the influence of  
368 genetic drift on the spatial genetic structure of wild populations.

## 369 **Methods**

### 370 **Simulated datasets**

371 For all simulations, we used a computational pipeline including the programs ABCsampler [81],  
372 Simcoal2.1.2 [82] and arlsumstat [83] to simulate and analyse microsatellite genetic datasets, with 15  
373 independent loci following a stepwise mutation model and a unique mutation rate  $\mu = 0.0005$ . Parameter values  
374 (local demes' effective population sizes  $Ne_i$  and symmetrical migration rates  $m_i$ ) were picked from prior  
375 distributions using ABCsampler and were then used as inputs in Simcoal2.1.2 to simulate genetic data based on a  
376 coalescent approach. In all simulations, 30 haploid genotypes (that is, 15 diploid individuals) were sampled from  
377 each deme at the end of simulations and were used to compute pairwise  $Fst$  among demes using arlsumstat.  $ds$ ,  
378  $di$  and  $dhm$  metrics were computed on the basis of demes' local carrying capacities  $K$ , with  $K_i = Ne_i + \alpha Ne_i$ . The  
379 parameter  $\alpha$  represents the uncertainty in the estimate of local demes' population size through an environmental  
380 proxy such as habitat patch size. The estimates of local demes' effective population size were considered as  
381 unbiased for  $\alpha = 0$ , or uncertain for  $\alpha \neq 0$ .  $ds$ ,  $di$  and  $dhm$  metrics computation as well as all statistical analyses  
382 were performed in R 3.1.2 [84].

383 We first investigated the match between  $Fst$  values and each metric in a simple two-deme situation. Local  
384 demes' population sizes  $Ne_i$  (expressed as haploid numbers of genes) were randomly picked from a uniform  
385 distribution ranging from  $i = [30 - 300]$  while the migration rate  $m$  was fixed at 0.005 and  $\alpha$  was set to 0. We  
386 simulated  $1 \times 10^5$  genetic datasets and computed, for each dataset, pairwise  $Fst$  as well as  $ds$ ,  $di$  and  $dhm$   
387 metrics. Both  $Ne_1$  and  $Ne_2$  were then divided into 30 classes of equal size and datasets were pooled for each  
388  $Ne_1 \times Ne_2$  combination of classes (i.e., 900 pools). For each pool, we computed mean values of  $Fst$ ,  $ds$ ,  $di$  and  $dhm$   
389 and eventually created four standardized pairwise matrices of size 30x30: a dependent matrix of mean  $Fst$  values  
390 and three explanatory matrices of mean  $ds$ ,  $di$  and  $dhm$  values respectively. In addition to plotting each matrix as  
391 a function of  $Ne_1$  and  $Ne_2$  classes, we computed the respective Pearson's correlation coefficients  $r$  between the  
392  $Fst$  matrix and each explanatory matrix.

393 Secondly, we assessed the explanatory power of each metric as a function of the migration rate  $m$  in a simple  
394 two-deme situation. Demes' population sizes were randomly picked from a truncated normal distribution with a  
395 mean of 40 and a standard deviation of 200, values being bounded between 40 and 1000 (S1 Fig), while  
396 migration rates  $m$  were picked from a uniform distribution ranging from 0.0001 to 0.3. As previously, the  
397 parameter  $\alpha$  was set to 0. We simulated  $6 \times 10^5$  genetic datasets and computed, for each dataset, pairwise  $Fst$  as  
398 well as  $ds$ ,  $di$  and  $dhm$  metrics. Datasets were then pooled according to their migration rate into 600 classes

399 defined every 0.0005 units (about 1000 datasets per class). For each class, we computed the model fit indices  $R^2$   
400 of the univariate linear regressions between  $Fst$  and each metric.

401 We then assessed the strength of each metric (compared to a resistance metric) in four complex situations  
402 differing according to both the network structure and the migration model used for simulations (S2 Fig). We  
403 considered two different network structures: a one-dimensional 16-deme linear network and a two-dimensional  
404 16-deme lattice network. Euclidean distances between adjacent demes were arbitrarily set to 100m. We  
405 considered two distinct migration models: a spatially structured island model (or IBD model [21]) for which  
406 migration rates  $m$  decreases with Euclidean distance following an inverse square function, and a spatially  
407 structured stepping-stone model [85] where demes can only exchange migrants with adjacent demes. For each  
408 situation, 10000 genetic datasets were simulated. As previously, the parameter  $\alpha$  was set to 0, demes' population  
409 sizes  $N$  were randomly picked from a truncated normal distribution with a mean of 40 and a standard deviation  
410 of 200, values being bounded between 40 and 1000, and migration rates  $m$  were picked from a uniform  
411 distribution ranging from 0.0001 to 0.3. For each simulated dataset, we computed five pairwise matrices ( $Fst$ ,  $ds$ ,  
412  $di$ ,  $dhm$  and Euclidean distances  $mr$ , the latter acting as a simple measure of inter-deme matrix resistance) and  
413 performed three multiple linear regressions between  $Fst$  and each metric, with  $mr$  as a unique covariate: (1)  
414  $Fst = (mr + ds)$ , (2)  $Fst = (mr + di)$  and (3)  $Fst = (mr + dhm)$ . All explanatory variables were z-  
415 transformed (by subtracting the mean and dividing by the standard deviation of the variable) before regressions  
416 so as to standardize parameter estimates. Commonality analysis, a variance partitioning procedure that is  
417 particularly suited to identify collinearity issues likely to arise in most spatially structured dataset [28,65], was  
418 used in R (package `yhat` [86]) to estimate the respective unique contribution of each explanatory variable to the  
419 variance in the dependent variable. This unique contribution (U) is the part of the total variance in the dependent  
420 variable that is explained by the sole effect of the predictor being considered ( $mr$  or one of the three distance-  
421 based metric of genetic drift). This approach improved the accuracy of the estimate of the contribution of each  
422 predictor when collinearity occurs. Datasets were finally pooled according to their migration rate into 30 classes  
423 defined every 0.01 units (about 330 datasets per class). For each class, we computed the mean and the standard  
424 deviation of unique contributions of each predictor. A unique contribution was considered as negligible as soon  
425 as the dispersion around the mean included zero.

426 Finally, we investigated the influence of uncertainty in the estimation of demes' population size through an  
427 environmental proxy. We used the same approach as described above (the same four genetic models with the

428 same initial sets of  $N_e$  and  $m$  parameters) but with the parameter  $\alpha$  picked from a uniform distribution ranging  
429 from -0.9 to 0.9 (S3 Fig).

430

### 431 **Empirical dataset**

432 As an empirical example, we considered neutral genetic data collected in the gudgeon (*Gobio occitaniae*), a  
433 small benthic freshwater fish. Fieldwork was conducted in accordance with French laws and with the approval of  
434 the Prefecture du Lot. Five hundred and sixty-two individuals were caught in 2011 using an electro-fishing in 19  
435 sampling sites scattered along the mainstream channel of the river Célé (South-western France; Fig. 6a). Sites  
436 were scattered so as to cover the whole upstream-downstream gradient. For each individual, we collected and  
437 preserved in 70% ethanol a small piece of pelvic fins, before releasing the fish in their original site. Genomic  
438 DNA was extracted from samples using a salt-extraction protocol [87]. Genotyping was performed using a  
439 subset of 11 autosomal microsatellite loci chosen among those described in Grenier et al [88] (S1 Table).  
440 Polymerase chain reactions (PCR) and genotyping were performed as in Grenier et al [88]. The presence of null  
441 alleles was assessed at each locus by analysing homozygote excess in each population using MICROCHECKER  
442 2.2.3 [89]. We also checked for linkage disequilibrium among loci and for Hardy-Weinberg equilibrium at each  
443 population using GENEPOP 4.2.1 [90] after sequential Bonferroni correction to account for multiple related tests  
444 [91]. Pairwise  $F_{st}$  were computed between all pairs of site following Weir and Cockerham [22] using the  
445 MATLAB software-coding environment [92,93].

446 Environmental variables were extracted from national vector datasets (BDCarthage from National  
447 Geographic Institute, France) and from the theoretical hydrographical network for France (RHT [94]) using  
448 ARCGIS 9.3. The riparian distance among sites was used as a measure of matrix resistance  $mr$  among sites. We  
449 first graphically inspected the linear relationship between pairwise  $F_{st}$  and the riparian distance  $mr$  between pairs  
450 of demes as proposed by Hutchison and Templeton [34] to assess migration-drift equilibrium (or lack of it) in  
451 our empirical dataset. We further investigated the observed pattern by using piecewise regression [95,96] to  
452 identify the distance threshold at which different linear relationships could be observed.

453 As proxies for local carrying capacities, we used the width of the river at each station (which supposedly  
454 reflect the total amount of available habitat [62-64]), as well as the estimated home-range size of each  
455 population. The home-range size of each deme was computed as the product of length and width of the river  
456 network (including tributaries) delimited by any downstream or upstream weir (see Blanchet et al. 2010 for a  
457 description of weirs in this river), that is the water area in which a gudgeon may freely move without

458 encountering any obstacle. Matrices of pairwise  $ds$ ,  $di$  and  $dhm$  were then computed from these estimates and  
459 were independently confronted to the matrix pairwise  $Fst$  using multiple regression on distance matrices  
460 (MRDM [97]; R package *ecodist*) with 1000 permutations and with  $mr$  as a covariate. Commonality analyses  
461 were then used to disentangle the relative contribution of each predictor to the variance in measures of genetic  
462 differentiation. Note that the  $ds$  matrix based on measures of river width was highly collinear with the  $mr$  matrix  
463 ( $r = 0.72$ ): the corresponding model was thus omitted because collinearity among predictors are likely to cause  
464 important interpretation issues [28]. Details are however provided in Supporting Information (S1 Text).

465 Finally, we plotted the residuals of the linear regression between  $Fst$  and the  $di$  metric (based on measures of  
466 river width) against  $mr$  and inspected the scatterplot to assess migration-drift equilibrium (or lack of it). We  
467 further investigated the observed pattern by using piecewise regression to identify the distance threshold at  
468 which different linear relationships could be observed. All piecewise regressions were performed using the R  
469 package *segmented* [98].

470

## 471 **Acknowledgments**

472 The authors thank G. Loot, I. Paz-Vinas, O. Rey and C. Veysière for their help on the field and in laboratory, as  
473 well as K. Saint-Pé for proofreading. The authors also thank the Office Nationale de l'Eau et des Milieux  
474 Aquatiques (ONEMA) for their support. Data used in this work were partly produced through the technical  
475 facilities of the Centre Méditerranéen Environnement Biodiversité.

476

## 477 **References**

- 478 1. Thomas CD, Kunin WE (1999) The spatial structure of populations. *Journal of Animal Ecology* 68: 647-657.
- 479 2. Hanski I, Gilpin M (1997) *Metapopulation Biology: Ecology, Genetics and Evolution*. New York: Academic  
480 Press.
- 481 3. Fahrig L (2003) Effects of habitat fragmentation on biodiversity. *Annual Review of Ecology Evolution and*  
482 *Systematics* 34: 487-515.
- 483 4. Ingvarsson PK (2001) Restoration of genetic variation lost - The genetic rescue hypothesis. *Trends in Ecology*  
484 *& Evolution* 16: 62-63.

- 485 5. Keyghobadi N (2007) The genetic implications of habitat fragmentation for animals. *Canadian Journal of*  
486 *Zoology-Revue Canadienne De Zoologie* 85: 1049-1064.
- 487 6. Broquet T, Ray N, Petit E, Fryxell JM, Burel F (2006) Genetic isolation by distance and landscape  
488 connectivity in the American marten (*Martes americana*). *Landscape Ecology* 21: 877-889.
- 489 7. Whitlock MC, McCauley DE (1999) Indirect measures of gene flow and migration:  $F_{ST}$  not equal  
490  $1/(4Nm+1)$ . *Heredity* 82: 117-125.
- 491 8. Ronce O (2007) How does it feel to be like a rolling stone? Ten questions about dispersal evolution. *Annual*  
492 *Review of Ecology Evolution and Systematics*. Palo Alto: Annual Reviews. pp. 231-253.
- 493 9. Bohonak AJ (1999) Dispersal, gene flow, and population structure. *Quarterly Review of Biology* 74: 21-45.
- 494 10. Sork VL, Nason J, Campbell DR, Fernandez JF (1999) Landscape approaches to historical and contemporary  
495 gene flow in plants. *Trends in Ecology & Evolution* 14: 219-224.
- 496 11. Vandewoestijne S, Baguette M (2004) Demographic versus genetic dispersal measures. *Population Ecology*  
497 46: 281-285.
- 498 12. Wilson GA, Rannala B (2003) Bayesian inference of recent migration rates using multilocus genotypes.  
499 *Genetics* 163: 1177-1191.
- 500 13. Broquet T, Yearsley J, Hirzel AH, Goudet J, Perrin N (2009) Inferring recent migration rates from individual  
501 genotypes. *Molecular Ecology* 18: 1048-1060.
- 502 14. Wang JL (2014) Estimation of migration rates from marker-based parentage analysis. *Molecular Ecology* 23:  
503 3191-3213.
- 504 15. Rousset F (2001) Genetic approaches to the estimation of dispersal rates. In: Clobert J, Danchin E, Dhont,  
505 Nichols JD, editors. *Dispersal*. New York: Oxford University Press. pp. 18-28.
- 506 16. Faubet P, Waples RS, Gaggiotti OE (2007) Evaluating the performance of a multilocus Bayesian method for  
507 the estimation of migration rates. *Molecular Ecology* 16: 1149-1166.
- 508 17. Manel S, Schwartz MK, Luikart G, Taberlet P (2003) Landscape genetics: combining landscape ecology and  
509 population genetics. *Trends in Ecology & Evolution* 18: 189-197.
- 510 18. Storfer A, Murphy MA, Evans JS, Goldberg CS, Robinson S, et al. (2007) Putting the 'landscape' in  
511 landscape genetics. *Heredity* 98: 128-142.
- 512 19. Holderegger R, Wagner HH (2008) Landscape genetics. *Bioscience* 58: 199-207.



- 513 20. Pflüger FJ, Balkenhol N (2014) A plea for simultaneously considering matrix quality and local  
514 environmental conditions when analysing landscape impacts on effective dispersal. *Molecular Ecology* 23:  
515 2146-2156.
- 516 21. Wright S (1931) Evolution in Mendelian populations. *Genetics* 16: 0097-0159.
- 517 22. Weir BS, Cockerham CC (1984) Estimating F-Statistics for the analysis of population structure. *Evolution*  
518 38: 1358-1370.
- 519 23. Jaquière J, Broquet T, Hirzel AH, Yearsley J, Perrin N (2011) Inferring landscape effects on dispersal from  
520 genetic distances: how far can we go? *Molecular Ecology* 20: 692-705.
- 521 24. Vos CC, Antonisse-De Jong AG, Goedhart PW, Smulders MJM (2001) Genetic similarity as a measure for  
522 connectivity between fragmented populations of the moor frog (*Rana arvalis*). *Heredity* 86: 598-608.
- 523 25. Zeller KA, McGarigal K, Whiteley AR (2012) Estimating landscape resistance to movement: a review.  
524 *Landscape Ecology* 27: 777-797.
- 525 26. Spear SF, Balkenhol N, Fortin MJ, McRae BH, Scribner K (2010) Use of resistance surfaces for landscape  
526 genetic studies: considerations for parameterization and analysis. *Molecular Ecology* 19: 3576-3591.
- 527 27. ter Braak CJF, Prentice IC (1988) A theory of gradient analysis. *Advances in Ecological Research* 18: 271-  
528 317.
- 529 28. Prunier JG, Colyn M, Legendre X, Nimon KF, Flamand MC (2015) Multicollinearity in spatial genetics:  
530 Separating the wheat from the chaff using commonality analyses. *Molecular Ecology* 24: 263-283.
- 531 29. Balkenhol N, Waits LP, Dezzani RJ (2009) Statistical approaches in landscape genetics: an evaluation of  
532 methods for linking landscape and genetic data. *Ecography* 32: 818-830.
- 533 30. Wright S (1943) Isolation by distance. *Genetics* 28: 114-138.
- 534 31. Knaapen JP, Scheffer M, Harms B (1992) Estimating habitat isolation in landscape planning. *Landscape and*  
535 *Urban Planning* 23: 1-16.
- 536 32. Wang IJ (2013) Examining the full effects of landscape heterogeneity on spatial genetic variation: a multiple  
537 matrix regression approach for quantifying geographic and ecological isolation. *Evolution* 67: 3403-3411.
- 538 33. Holsinger KE, Weir BS (2009) Genetics in geographically structured populations: defining, estimating and  
539 interpreting  $F_{st}$ . *Nature Reviews Genetics* 10: 639-650.
- 540 34. Hutchison DW, Templeton AR (1999) Correlation of pairwise genetic and geographic distance measures:  
541 Inferring the relative influences of gene flow and drift on the distribution of genetic variability. *Evolution* 53:  
542 1898-1914.

- 543 35. Slatkin M (1985) Gene flow in natural-populations. *Annual Review of Ecology and Systematics* 16: 393-  
544 430.
- 545 36. Wright S (1951) The genetical structure of populations. *Annals of Eugenics* 15: 323-354.
- 546 37. Allendorf FW (1986) Genetic drift and the loss of alleles versus heterozygosity. *Zoo Biology* 5: 181-190.
- 547 38. Slatkin M (1977) Gene flow and genetic drift in a species subject to frequent local extinctions. *Theoretical*  
548 *Population Biology* 12: 253-262.
- 549 39. Whitlock MC (2011)  $G'_{ST}$  and  $D$  do not replace  $F_{ST}$ . *Molecular Ecology* 20: 1083-1091.
- 550 40. Serrouya R, Paetkau D, McLellan BN, Boutin S, Campbell M, et al. (2012) Population size and major valleys  
551 explain microsatellite variation better than taxonomic units for caribou in western Canada. *Molecular*  
552 *Ecology* 21: 2588-2601.
- 553 41. Graves TA, Beier P, Royle JA (2013) Current approaches using genetic distances produce poor estimates of  
554 landscape resistance to interindividual dispersal. *Molecular Ecology* 22: 3888-3903.
- 555 42. Rousset F (1997) Genetic differentiation and estimation of gene flow from F-statistics under isolation by  
556 distance. *Genetics* 145: 1219-1228.
- 557 43. Rousset F (2000) Genetic differentiation between individuals. *Journal of Evolutionary Biology* 13: 58-62.
- 558 44. Hardy OJ, Vekemans X (1999) Isolation by distance in a continuous population: reconciliation between  
559 spatial autocorrelation analysis and population genetics models. *Heredity* 83: 145-154.
- 560 45. Relethford JH (1991) Genetic drift and anthropometric variation in Ireland. *Human Biology* 63: 155-165.
- 561 46. Weckworth BV, Musiani M, DeCesare NJ, McDevitt AD, Hebblewhite M, et al. (2013) Preferred habitat and  
562 effective population size drive landscape genetic patterns in an endangered species. *Proceedings of the Royal*  
563 *Society B-Biological Sciences* 280.
- 564 47. Mager KH, Colson KE, Groves P, Hundertmark KJ (2014) Population structure over a broad spatial scale  
565 driven by nonanthropogenic factors in a wide-ranging migratory mammal, Alaskan caribou. *Molecular*  
566 *Ecology* 23: 6045-6057.
- 567 48. Wang JL (2005) Estimation of effective population sizes from data on genetic markers. *Philosophical*  
568 *Transactions of the Royal Society B-Biological Sciences* 360: 1395-1409.
- 569 49. Whigham PA, Dick GC, Spencer HG (2008) Genetic drift on networks: Ploidy and the time to fixation.  
570 *Theoretical Population Biology* 74: 283-290.

- 571 50. Ryman N, Allendorf FW, Jorde PE, Laikre L, Hossjer O (2014) Samples from subdivided populations yield  
572 biased estimates of effective size that overestimate the rate of loss of genetic variation. *Molecular Ecology*  
573 *Resources* 14: 87-99.
- 574 51. Sayre NF (2008) The genesis, history, and limits of carrying capacity. *Annals of the Association of American*  
575 *Geographers* 98: 120-134.
- 576 52. Hanski I (1994) A practical model of metapopulation dynamics. *Journal of Animal Ecology* 63: 151-162.
- 577 53. Gregr EJ, Nichol LM, Watson JC, Ford JKB, Ellis GM (2008) Estimating carrying capacity for sea otters in  
578 British Columbia. *Journal of Wildlife Management* 72: 382-388.
- 579 54. Verboom J, Schotman A, Opdam P, Metz JAJ (1991) European nuthatch metapopulations in a fragmented  
580 agricultural landscape. *Oikos* 61: 149-156.
- 581 55. Peterman WE, Anderson TL, Ousterhout BH, Drake DL, Semlitsch RD, et al. (2015) Differential dispersal  
582 shapes population structure and patterns of genetic differentiation in two sympatric pond breeding  
583 salamanders. *Conservation Genetics* 16: 59-69.
- 584 56. Orsini L, Vanoverbeke J, Swillen I, Mergeay J, De Meester L (2013) Drivers of population genetic  
585 differentiation in the wild: isolation by dispersal limitation, isolation by adaptation and isolation by  
586 colonization. *Molecular Ecology* 22: 5983-5999.
- 587 57. Sexton JP, Hangartner SB, Hoffmann AA (2014) Genetic isolation by environment or distance: which  
588 pattern of gene flow is most common? *Evolution* 68: 1-15.
- 589 58. Wang IJ, Bradburd GS (2014) Isolation by environment. *Molecular Ecology* 23: 5649-5662.
- 590 59. Andrew RL, Ostevik KL, Ebert DP, Rieseberg LH (2012) Adaptation with gene flow across the landscape in  
591 a dune sunflower. *Molecular Ecology* 21: 2078-2091.
- 592 60. Papadopulos AST, Kaye M, Devaux C, Hipperson H, Lighten J, et al. (2014) Evaluation of genetic isolation  
593 within an island flora reveals unusually widespread local adaptation and supports sympatric speciation.  
594 *Philosophical Transactions of the Royal Society B-Biological Sciences* 369.
- 595 61. Gray MM, St Amand P, Bello NM, Galliard MB, Knapp M, et al. (2014) Ecotypes of an ecologically  
596 dominant prairie grass (*Andropogon gerardii*) exhibit genetic divergence across the US Midwest grasslands'  
597 environmental gradient. *Molecular Ecology* 23: 6011-6028.
- 598 62. Raeymaekers JAM, Raeymaekers D, Koizumi I, Geldof S, Volckaert FAM (2009) Guidelines for restoring  
599 connectivity around water mills: a population genetic approach to the management of riverine fish. *Journal of*  
600 *Applied Ecology* 46: 562-571.

- 601 63. Raeymaekers JAM, Maes GE, Geldof S, Hontis I, Nackaerts K, et al. (2008) Modeling genetic connectivity  
602 in sticklebacks as a guideline for river restoration. *Evolutionary Applications* 1: 475-488.
- 603 64. Frankham R (1996) Relationship of genetic variation to population size in wildlife. *Conservation Biology* 10:  
604 1500-1508.
- 605 65. Ray-Mukherjee J, Nimon K, Mukherjee S, Morris DW, Slotow R, et al. (2014) Using commonality analysis  
606 in multiple regressions: a tool to decompose regression effects in the face of multicollinearity. *Methods in*  
607 *Ecology and Evolution* 5: 320-328.
- 608 66. Hartl DL, Clark AG (2007) *Principles of population genetics*. Sunderland, Mass: Sinauer Associates. 652 p.
- 609 67. Visconti P, Elkin C (2009) Using connectivity metrics in conservation planning - when does habitat quality  
610 matter? *Diversity and Distributions* 15: 602-612.
- 611 68. Fahrig L, Merriam G (1994) Conservation of Fragmented Populations. *Conservation Biology* 8: 50-59.
- 612 69. Matthysen E (2005) Density-dependent dispersal in birds and mammals. *Ecography* 28: 403-416.
- 613 70. Stamps JA (2001) Habitat selection by dispersers: integrating proximate and ultimate approaches. In: Clobert  
614 J, Danchin E, Dhondt AA, Nichols JD, editors. New York: Oxford University Press. pp. 230–242.
- 615 71. Bonte D, Lukac M, Lens L (2008) Starvation affects pre-dispersal behaviour of *Erigone* spiders. *Basic and*  
616 *Applied Ecology* 9: 308-315.
- 617 72. Mathieu J, Barot S, Blouin M, Caro G, Decaens T, et al. (2010) Habitat quality, conspecific density, and  
618 habitat pre-use affect the dispersal behaviour of two earthworm species, *Aporrectodea icterica* and  
619 *Dendrobaena veneta*, in a mesocosm experiment. *Soil Biology & Biochemistry* 42: 203-209.
- 620 73. Meirmans PG (2014) Nonconvergence in Bayesian estimation of migration rates. *Molecular Ecology*  
621 *Resources* 14: 726-733.
- 622 74. Wang JL, Whitlock MC (2003) Estimating effective population size and migration rates from genetic  
623 samples over space and time. *Genetics* 163: 429-446.
- 624 75. Blanchet S, Rey O, Etienne R, Lek S, Loot G (2010) Species-specific responses to landscape fragmentation:  
625 implications for management strategies. *Evolutionary Applications* 3: 291-304.
- 626 76. Joly P, Miaud C, Lehmann A, Grolet O (2001) Habitat matrix effects on pond occupancy in newts.  
627 *Conservation Biology* 15: 239-248.
- 628 77. Nei M, Maruyama T, Chakraborty R (1975) The bottleneck effect and genetic variability in populations.  
629 *Evolution* 29: 1-10.

- 630 78. Ellstrand NC, Elam DR (1993) Population genetic consequences of small population-size - Implications for  
631 plant conservation. *Annual Review of Ecology and Systematics* 24: 217-242.
- 632 79. Lowe WH, Allendorf FW (2010) What can genetics tell us about population connectivity? *Molecular*  
633 *Ecology* 19: 3038-3051.
- 634 80. Fischer J, Lindenmayer DB (2007) Landscape modification and habitat fragmentation: a synthesis. *Global*  
635 *Ecology and Biogeography* 16: 265-280.
- 636 81. Wegmann D, Leuenberger C, Neuenschwander S, Excoffier L (2010) ABCtoolbox: a versatile toolkit for  
637 approximate Bayesian computations. *BMC Bioinformatics* 11.
- 638 82. Laval G, Excoffier L (2004) SIMCOAL 2.0: a program to simulate genomic diversity over large recombining  
639 regions in a subdivided population with a complex history. *Bioinformatics* 20: 2485-2487.
- 640 83. Excoffier L, Lischer HEL (2010) Arlequin suite ver 3.5: a new series of programs to perform population  
641 genetics analyses under Linux and Windows. *Molecular Ecology Resources* 10: 564-567.
- 642 84. R Development Core Team (2014) R: A Language and Environment for Statistical Computing, R Foundation  
643 for Statistical Computing.
- 644 85. Kimura M, Weiss GH (1964) The stepping stone model of population structure and the decrease of genetic  
645 correlation with distance. *Genetics* 49: 561-576.
- 646 86. Nimon K, Oswald FL, Roberts JK (2013) Interpreting regression effects. R package version 2.0-0. Available:  
647 <http://cran.r-project.org/web/packages/yhat/index.html>
- 648 87. Aljanabi SM, Martinez I (1997) Universal and rapid salt-extraction of high quality genomic DNA for PCR-  
649 based techniques. *Nucleic Acids Research* 25: 4692-4693.
- 650 88. Grenier R, Costedoat C, Chappaz R, Dubut V (2013) Two multiplexed sets of 21 and 18 microsatellites for  
651 *Phoxinus phoxinus* (L.) and *Gobio gobio* (L.) developed by cross-species amplification. *European Journal of*  
652 *Wildlife Research* 59: 291-297.
- 653 89. Van Oosterhout C, Hutchinson WF, Wills DPM, Shipley P (2004) MICRO-CHECKER: software for  
654 identifying and correcting genotyping errors in microsatellite data. *Molecular Ecology Notes* 4: 535-538.
- 655 90. Rousset F (2008) GENEPOP '007: a complete re-implementation of the GENEPOP software for Windows  
656 and Linux. *Molecular Ecology Resources* 8: 103-106.
- 657 91. Rice WR (1989) Analysing tables of statistical tests. *Evolution* 43: 223-225.

- 658 92. Prunier JG, Kaufmann B, Fenet S, Picard D, Pompanon F, et al. (2013) Optimizing the trade-off between  
659 spatial and genetic sampling efforts in patchy populations: towards a better assessment of functional  
660 connectivity using an individual-based sampling scheme. *Molecular Ecology* 22: 5516-5530.
- 661 93. MATLAB and Statistics Toolbox Release 2010a TM, Inc., Natick, Massachusetts, United States.
- 662 94. Pella H, Lejot J, Lamouroux N, Snelder T (2012) Le réseau hydrographique théorique (RHT) français et ses  
663 attributs environnementaux. *Géomorphologie : relief, processus, environnement* 3.
- 664 95. Toms JD, Lesperance ML (2003) Piecewise regression: A tool for identifying ecological thresholds. *Ecology*  
665 84: 2034-2041.
- 666 96. Rey O, Turgeon J (2007) Influence of historical events and contemporary estuarine circulation on the genetic  
667 structure of the banded killifish (*Fundulus diaphanus*) in the St. Lawrence River (Quebec, Canada). *Canadian*  
668 *Journal of Zoology-Revue Canadienne De Zoologie* 85: 891-901.
- 669 97. Lichstein JW (2007) Multiple regression on distance matrices: a multivariate spatial analysis tool. *Plant*  
670 *Ecology* 188: 117-131.
- 671 98. Muggeo VMR (2008) segmented: an R Package to Fit Regression Models with Broken-Line Relationships. *R*  
672 *News* 8: 20-25.

673

674

675

## 676 **Supporting Information**

677 **S1 Fig.** Theoretical distribution of 10000 demes' population sizes randomly picked from a truncated normal  
678 distribution with a mean of 40 and a standard deviation of 200, values being bounded between 40 and 1000.

679 **S2 Fig.** Network structures and migration models used in simulated datasets.

680 **S3 Fig.** Theoretical distribution of Pearson's  $r$  correlation values between the effective population sizes  $N$  used  
681 for simulations and local carrying capacities  $K$  used to compute genetic drift metrics for an uncertainty parameter  
682  $\alpha$  picked from an uniform distribution ranging from -0.9 to 0.9, in 10000 sixteen-deme datasets.

683 **S4 Fig.** Distribution of average estimates of migration rates in 49 recent empirical studies (See S2 Table).

684 **S1 Table.** Summary data for the 11 microsatellite loci used in the empirical dataset. Number of alleles ( $A$ ; in  
685 brackets, effective number of alleles), observed and expected heterozygosity ( $H_o$  and  $H_e$ ) and fixation index ( $f$ )  
686 are given for each locus for the  $N$  individuals collected from each of the 19 sampled populations. Genebank ID  
687 are provided in brackets, below the locus name.

688 **S2 Table.** Summary statistics of the 49 empirical studies considered to estimate the range of migration rates  
689 likely to be encountered in natural systems (from [73]).

690 **S1 Text.** Empirical results from the model  $F_{st} = ds + mr$ , with  $ds$  computed from river width.

691 **S2 Text.** Selection criteria for empirical studies cited in the literature survey by Patrick G. Meirmans [73] (See  
692 also S2 Table).

693 **S1 Dataset.** Raw data used to investigate the match between  $F_{st}$  values and each IBDr metric in a simple two-  
694 deme situation (Fig 2). For each simulation (Sim), the file provides effective population sizes of population 1  
695 ( $N_1$ ) and population 2 ( $N_2$ ), as well as pairwise FST (FST).

696 **S2 Dataset.** Raw data used to assess the explanatory power of each IBDr metric as a function of the migration  
697 rate  $m$  in a simple two-deme situation (Fig 3). For each simulation (Sim), the file provides the migration rate  
698 (MIG), effective population sizes of population 1 ( $N_1$ ) and population 2 ( $N_2$ ) as well as pairwise FST (FST).

699 **S3 Dataset.** Structure of pairwise matrices of migration rates used to assess the strength of each IBDr metric  
700 compared to a resistance metric in four complex situations differing according to both the network structure and  
701 the migration model.

702 **S4 Dataset.** Raw data used to assess the strength of each IBDr metric compared to a resistance metric in a one-  
703 dimensional 16-deme linear network with stepping-stone migration and the  $\alpha$  parameter set to 0 (i.e.,  $N = K$ ;  
704 Fig4 a, e, i). For each simulation (Sim), the file provides the migration rate (MIG), the effective population size

705 (N1-N16) and the estimated carrying capacity (K1-K16) of each population, as well as pairwise FST (from  
706 FST\_2\_1 to FST\_16\_15).

707 **S5 Dataset.** Raw data used to assess the strength of each IBDr metric compared to a resistance metric in a one-  
708 dimensional 16-deme linear network with spatially limited dispersal and the  $\alpha$  parameter set to 0 (i.e.,  $N = K$ ;  
709 Fig4 b, f, j). Details as in S4 Data.

710 **S6 Dataset.** Raw data used to assess the strength of each IBDr metric compared to a resistance metric in a two-  
711 dimensional 16-deme lattice network with stepping-stone migration and the  $\alpha$  parameter set to 0 (i.e.,  $N = K$ ;  
712 Fig4 c, g, k). Details as in S4 Data.

713 **S7 Dataset.** Raw data used to assess the strength of each IBDr metric compared to a resistance metric in a two-  
714 dimensional 16-deme lattice network with spatially limited dispersal and the  $\alpha$  parameter set to 0 (i.e.,  $N = K$ ;  
715 Fig4 d, h, l). Details as in S4 Data.

716 **S8 Dataset.** Raw data used to assess the strength of each IBDr metric compared to a resistance metric in a one-  
717 dimensional 16-deme linear network with stepping-stone migration and the  $\alpha$  parameter picked from a uniform  
718 distribution ranging from -0.9 to 0.9 (i.e.,  $N \neq K$ ; Fig5 a, e, i). For each simulation (Sim), the file provides the  
719 migration rate (MIG), the effective population size (N1-N16), the  $\alpha$  parameter (NOISE1-NOISE16) and the  
720 estimated carrying capacity (K1-K16) of each population, as well as pairwise FST (from FST\_2\_1 to  
721 FST\_16\_15).

722 **S9 Dataset.** Raw data used to assess the strength of each IBDr metric compared to a resistance metric in a one-  
723 dimensional 16-deme linear network with spatially limited dispersal and the  $\alpha$  parameter picked from a uniform  
724 distribution ranging from -0.9 to 0.9 (i.e.,  $N \neq K$ ; Fig5 b, f, j). Details as in S8 Data.

725 **S10 Dataset.** Raw data used to assess the strength of each IBDr metric compared to a resistance metric in a two-  
726 dimensional 16-deme lattice network with stepping-stone migration and the  $\alpha$  parameter picked from a uniform  
727 distribution ranging from -0.9 to 0.9 (i.e.,  $N \neq K$ ; Fig5 c, g, k). Details as in S8 Data.

728 **S11 Dataset.** Raw data used to assess the strength of each IBDr metric compared to a resistance metric in a two-  
729 dimensional 16-deme lattice network with spatially limited dispersal and the  $\alpha$  picked from a uniform  
730 distribution ranging from -0.9 to 0.9 (i.e.,  $N \neq K$ ; Fig5 d, h, l). Details as in S8 Data.

731 **S12 Dataset. Empirical data.** For each population, the "landscapedata" sheet provides the width of the river at  
732 sampling point (RiverWidth, in m), the size of the home-range at sampling point (HomeRange, in m<sup>2</sup>), the  
733 distance from the source, used to computed riverine distances (DistFromSource, in m). The "Geneticdata" sheet  
734 provides the pairwise matrix of FST.
